# Supplementary material for: Development of novel polymer electrolyte membranes based on a benzothiadiazole unit
Source: Royal Society of Chemistry journal article supplement (doi:10.1039/c6ra20784g), 2016-01-01
Supplement: c6ra20784g1.pdf [file c6ra20784g1.pdf]

## Supporting Information

### Development of Novel Polymer Electrolyte Membranes Based on a Benzothiadiazole Unit

Shuntaro Amari, Shinji Ando\* and Takeo Yamaguchi\*

\*To whom correspondence should be addressed.

Email: [ando.s.af@m.titech.ac.jp](mailto:ando.s.af@m.titech.ac.jp) (S.A.)

[yamag@res.titech.ac.jp](mailto:yamag@res.titech.ac.jp) (T.Y.)

### Table of Contents

#### Materials and Methods

|                                          |    |
|------------------------------------------|----|
| 1. Materials.....                        | S2 |
| 2. General .....                         | S2 |
| 3. Synthesis .....                       | S3 |
| 4. Structural Analysis .....             | S4 |
| 5. Water Content Measurements .....      | S4 |
| 6. Swelling Ratio Measurements.....      | S5 |
| 7. Proton Conductivity Measurements..... | S5 |
| 8. Supporting Reference.....             | S5 |
| 9. Supplementary Figures.....            | S6 |

## Materials and Methods

### 1. Materials

4,4'-Biphenol (BP) and 4,4'-dichlorodiphenyl sulphone (DCDPS) were purchased from Tokyo Chemical Industry Co. and used after drying in a vacuum oven for 24 h at 80°C. 3,3'-Disulphonated-4,4'- dichlorodiphenyl sulphone sodium salt (SDCDPS) were purchased from NARD Institute Ltd. and used after drying in a vacuum oven for 24 h at 80°C. p-Fluorophenylboronic acid (FPB), 2-dicyclohexylphosphino-2',6'-dimethoxybiphenyl (SPhos) and 4,7-dibromo-2,1,3- benzothiadiazole (DBBTD), potassium carbonate ( $K_2CO_3$ ), palladium(II) acetate ( $Pd(OAc)_2$ ), tripotassium phosphate ( $K_3PO_4$ ), *N*-methylpyrrolidone (NMP), tetrahydrofuran (THF), and toluene were purchased from Wako Pure Chemical Industries, Ltd.  $K_2CO_3$  was used after drying in a vacuum oven at 80°C for 24 h.

### 2. General

$^1H$  and  $^{13}C$  NMR spectra were recorded on a Bruker model AVANCE-500 spectrometer, operating at 500 MHz for  $^1H$  and 125 Hz for  $^{13}C$ , respectively, where chemical shifts ( $\delta$  in ppm) were determined with respect to non-deuterated solvent residues as internal references. Degree of sulphonation and ion exchange capacity (IEC) of the products were estimated from the integral intensity of  $^1H$  NMR. The calculation method is given in a previous study.<sup>S1</sup> Thermogravimetric analysis (TGA) was performed on a PerkinElmer model Pyris 1 TGA, where the heating profile was recorded and analyzed using a PerkinElmer Pyris software system. Gel permeation chromatography (GPC, L-7100 Hitachi Co. Ltd.; Shodex Oven A0-30, Showa Denko K.K.; Shodex RI-71, Showa Denko K.K.; UV L-7400, Hitachi Co. Ltd.; Shodex Asahipak GF-7MHQ columns, Showa Denko K.K.) was employed to determine the weight-average molecular weight ( $M_w$ ) and number-average molecular weight ( $M_n$ ) of the product. The standard curve used to determine the molecular weight was created from a polystyrene standard solution (TSK, Tosoh Corp.).

### 3. Synthesis

#### Hydrophobic monomer based on benzothiadiazole unit

FPB (4.53 g, 32.3 mmol), DBBTD (4.53 g, 15.4 mmol), Pd(OAc)<sub>2</sub> (0.692 g, 3.08 mmol), SPhos (1.27 g, 3.09 mmol), K<sub>3</sub>PO<sub>4</sub> (16.4 g, 77.1 mmol), 95 ml of THF and 40 ml of water were added to a two-necked 300 ml round-bottom flask with a reflux condenser and stirring bar. The atmosphere in the flask was changed from air to argon (Ar) gas. The reaction was carried out for 6 h at 80°C. After the reaction, the flask was cooled to room temperature. The reaction mixture was poured into a large amount of water. Heated chloroform was added to the crude product. The solution was distilled to remove the solvent. The obtained solid was sublimated at 250°C overnight. After that, the product was dried in a vacuum oven at 80°C for 24 h to remove the solvent completely. Yield: 68%. <sup>1</sup>H NMR (500 MHz, DMSO *d*6): (ppm) 8.09–8.06 (*H<sub>b</sub>*), 7.97 (*H<sub>c</sub>*), 7.43–7.39 (*H<sub>a</sub>*). <sup>13</sup>C NMR (125 MHz, DMSO *d*6): (ppm) 163.68, 161.72, 153.74, 133.67–133.65, 131.72–131.64, 128.75, 116.06–15.89.

Another research group has already synthesized the BT-based monomer using a different catalyst and reaction conditions.<sup>S2</sup>

#### SPES-0.1%BT

SDCDPS (5.1083 g, 10.4 mmol), BP (3.8723 g, 20.8 mmol), DCDPS (2.9794 g, 10.4 mmol), BT (0.0068 g, 0.021 mmol), K<sub>2</sub>CO<sub>3</sub> (5.2108 g, 37.7 mmol) and 90 ml of NMP were added to a three-necked 300 ml flask equipped with a reflux condenser, a dean–stark trap, a nitrogen inlet and a mechanical stirrer. The solution was heated at 135°C for 3 h to dissolve the monomer in NMP. To this solution, 30 ml of toluene was added and the mixture was heated at 155°C until toluene was completely removed. The resulting solution was kept at 185°C for 12 h. After cooling to room temperature, the mixture was filtered to remove K<sub>2</sub>CO<sub>3</sub>. The filtered solution was placed on a molecular porous membrane and dialysed while replacing the outside solvent for 1 day. The solution was poured into a large amount of 2-propanol. The crude product was washed with hot methanol several times and dried in a vacuum oven at 80°C for 24 h. Yield: 85%. <sup>1</sup>H NMR (500 MHz, DMSO *d*6): (ppm) 8.30 (*H<sub>c</sub>*), 8.12 (*H<sub>n</sub>*), 7.96–7.94 (*H<sub>i</sub>*, *H<sub>m</sub>*), 7.85 (*H<sub>d</sub>*), 7.74–7.70 (*H<sub>b</sub>*, *H<sub>g</sub>*, *H<sub>k</sub>*), 7.22–7.11 (*H<sub>a</sub>*, *H<sub>f</sub>*, *H<sub>h</sub>*, *H<sub>j</sub>*, *H<sub>l</sub>*), 7.01 (*H<sub>c</sub>*). <sup>13</sup>C NMR (125 MHz, DMSO *d*6): (ppm) 161.39–161.30 (*H<sub>s</sub>*, *H<sub>z</sub>*) 158.26 (*H<sub>e</sub>*) 155.59–155.29 (*H<sub>k</sub>*, *H<sub>v</sub>*), 154.12–153.93 (*H<sub>a</sub>*, *H<sub>o</sub>*), 139.22–134.21 (*H<sub>d</sub>*, *H<sub>h</sub>*, *H<sub>j</sub>*, *H<sub>n</sub>*, *H<sub>r</sub>*, *H<sub>t</sub>*, *H<sub>y</sub>*, *H<sub>b</sub>*'), 129.94 (*H<sub>g</sub>*), 128.61–128.22 (*H<sub>c</sub>*, *H<sub>i</sub>*, *H<sub>m</sub>*, *H<sub>q</sub>*, *H<sub>u</sub>*, *H<sub>x</sub>*), 120.79–119.41 (*H<sub>b</sub>*, *H<sub>f</sub>*, *H<sub>l</sub>*, *H<sub>p</sub>*, *H<sub>w</sub>*), 118.01 (*H<sub>a</sub>*).

### SPES-1%BT

SDCDPS (2.5504 g, 5.19 mmol), BP (1.9338 g, 10.4 mmol), DCDPS (1.4610 g, 5.09 mmol), BT (0.0336 g, 0.104 mmol), K<sub>2</sub>CO<sub>3</sub> (3.3743 g, 24.4 mmol) and 60 ml of NMP were added to a three-necked 200 ml flask equipped with a reflux condenser, a dean–stark trap, a nitrogen inlet and a mechanical stirrer. The solution was heated at 135°C for 2 h to dissolve the monomer in NMP. To this solution, 30 ml of toluene was added and the mixture was heated at 155°C until toluene was completely removed. The resulting solution was kept at 185°C for 24 h. After cooling to room temperature, the mixture was filtered to remove K<sub>2</sub>CO<sub>3</sub>. The filtered solution was placed on a molecular porous membrane and dialysed while replacing the outside solvent for 1 day. The solution was poured into a large amount of 2-propanol. The crude product was washed with hot methanol several times and dried in a vacuum oven at 80°C for 24 h. Yield: 71%. <sup>1</sup>H NMR (500 MHz, DMSO *d*6): (ppm) 8.30 (*H<sub>e</sub>*), 8.12 (*H<sub>n</sub>*), 7.96–7.94 (*H<sub>i</sub>*, *H<sub>m</sub>*), 7.85 (*H<sub>d</sub>*), 7.74–7.70 (*H<sub>b</sub>*, *H<sub>g</sub>*, *H<sub>k</sub>*), 7.22–7.11 (*H<sub>a</sub>*, *H<sub>f</sub>*, *H<sub>h</sub>*, *H<sub>j</sub>*, *H<sub>l</sub>*), 7.01 (*H<sub>c</sub>*). <sup>13</sup>C NMR (125 MHz, DMSO *d*6): (ppm) 161.39–161.30 (*H<sub>s</sub>*, *H<sub>z</sub>*) 158.26 (*H<sub>e</sub>*) 155.59–155.29 (*H<sub>k</sub>*, *H<sub>v</sub>*), 154.12–153.93 (*H<sub>a</sub>*, *H<sub>o</sub>*), 139.22–134.21 (*H<sub>d</sub>*, *H<sub>h</sub>*, *H<sub>j</sub>*, *H<sub>n</sub>*, *H<sub>r</sub>*, *H<sub>t</sub>*, *H<sub>y</sub>*, *H<sub>b</sub>*, *H<sub>c</sub>*), 129.94 (*H<sub>g</sub>*), 128.61–128.22 (*H<sub>c</sub>*, *H<sub>i</sub>*, *H<sub>m</sub>*, *H<sub>q</sub>*, *H<sub>u</sub>*, *H<sub>x</sub>*), 120.79–119.41 (*H<sub>b</sub>*, *H<sub>f</sub>*, *H<sub>l</sub>*, *H<sub>p</sub>*, *H<sub>w</sub>*), 118.01 (*H<sub>a</sub>*).

### 4. Structural Analysis

Tapping-mode atomic force microscope (AFM, Cypher S, Oxford Instruments) analysis was used to investigate the membrane surface morphology. AFM was performed using micro-fabricated cantilevers. All samples were dried at 50°C for 24 h under vacuum before AFM measurements.

### 5. Water Content Measurements

The water content was measured by measuring the amount of water adsorbed at 80°C as a function of relative humidity (30%–95%). The membranes were dried at 60°C in vacuum oven for 15 min to get the dry weight (*W<sub>dry</sub>*). The swollen membranes were swollen at 80°C suspended in an atmosphere of each relative humidity condition to obtain the wet weight of membrane (*W<sub>wet</sub>*). The water content of the membranes was calculated using Eq. 1.

$$\text{Water content} = (W_{\text{swollen}} - W_{\text{dry}})/W_{\text{dry}} \times 100\% \quad (1)$$

where *W<sub>dry</sub>* is the membrane's weight in the dry state and *W<sub>swollen</sub>* is the swollen weight of the membrane.

## 6. Swelling Ratio Measurements

The swelling ratio was measured by the change in the volume of the membranes. The membranes were dried at 80°C in vacuum oven for 24 h to obtain the dry volume ( $V_{dry}$ ). The swollen membranes were swollen in water for 1 h at 80°C to obtain the wet volume of membrane ( $V_{wet}$ ). The swelling ratio of the membranes was calculated using Eq. 2.

$$\text{Swelling ratio} = (V_{swollen} - V_{dry})/V_{dry} \times 100\% \quad (2)$$

where  $V_{dry}$  is the dry volume of the membrane and  $V_{swollen}$  is the swollen volume of the membranes after hot water treatment.

## 7. Proton Conductivity Measurements

The proton conductivity  $\sigma$  (S/cm) of the membranes was measured by an AC impedance method using a Solatron 1260 impedance analyzer, as reported in the previous study.<sup>S1</sup> Four platinum electrodes were placed on a membrane on a glass plate. Another glass plate was placed on the platinum electrode to hold both the membrane and the electrodes. The measurement conditions were controlled by a bench-top-type temperature and humidity chamber (SH-221, ESPEC). The impedance spectra were then measured using ZPlot/ZView software (Scribner Associates) under an AC perturbation signal of 10 mV for in the frequency range of 1 Hz to 10000 KHz. The proton conductivity  $\sigma$  (S/cm) of the membranes was calculated using Eq. 3.

$$\text{Proton conductivity } \sigma = D/(R \times L \times T) \times 10^4 \text{ S/cm} \quad (3)$$

where  $R$  is the membrane resistance,  $D$  is the distance between two platinum electrodes,  $L$  is the membrane width, and  $T$  is the membrane thickness.

## 8. Supporting Reference

- S1. N. Hara, H. Ohashi, T. Ito and T. Yamaguchi, *J. Phys. Chem. B*, 2009, **113**, 4656–4663.
- S2. F. S. Mancilha, B. A. D. Neto, A. S. Lopes, P. F. Moreira, F. H. Quina, R. S. Goncalves and J. Dupont, *Eur. J. Org. Chem.*, 2006, **21**, 4924–4933.

## 9. Supplementary Figures

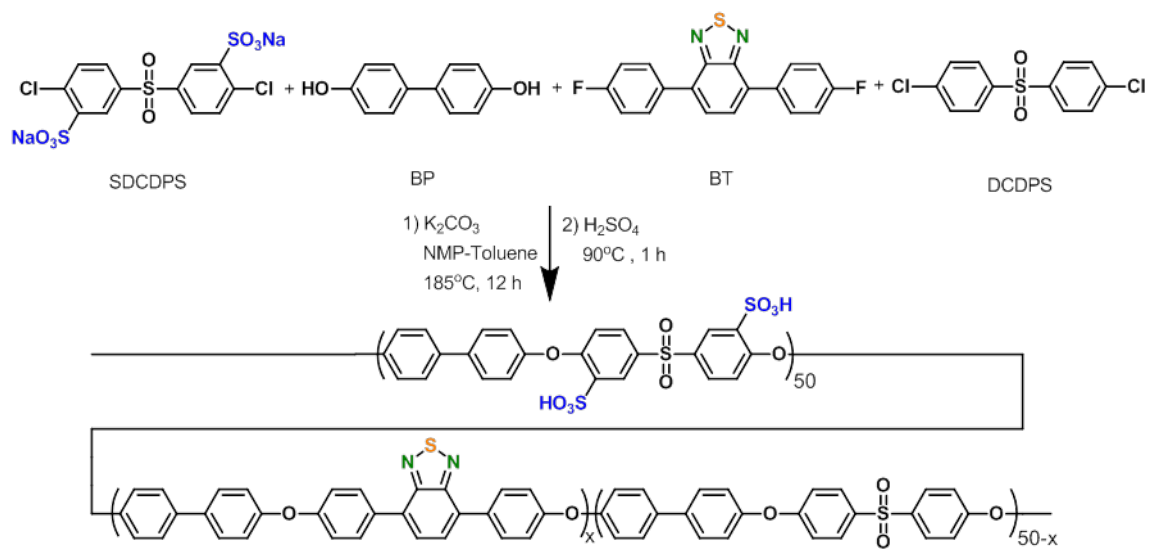

**Fig. S1** Schematic representation for the synthesis of BT-based copolymers ( $x = 0.1, 1$ ).

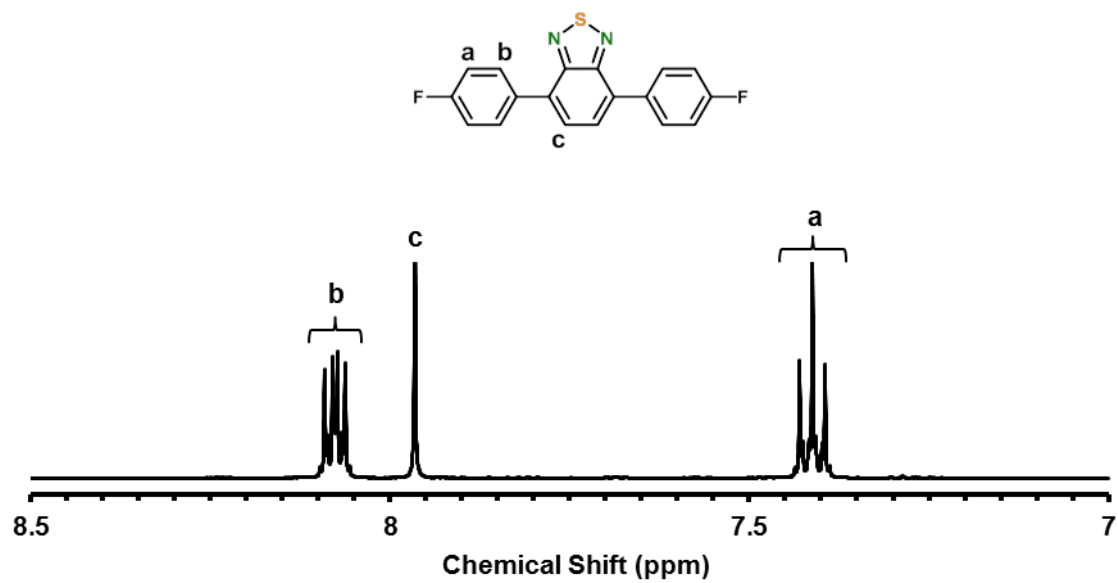

**Fig. S2**  $^1\text{H}$  NMR spectra of hydrophobic BT-based monomer.

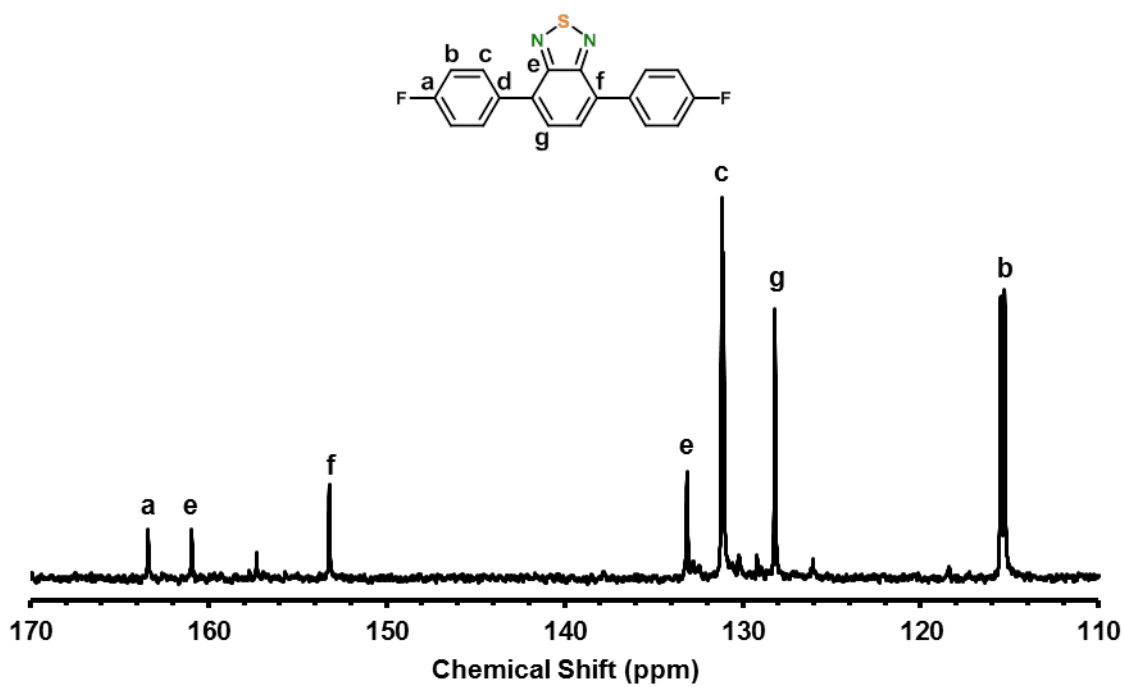

**Fig. S3**  $^{13}\text{C}$  NMR spectra of hydrophobic BT-based monomer.

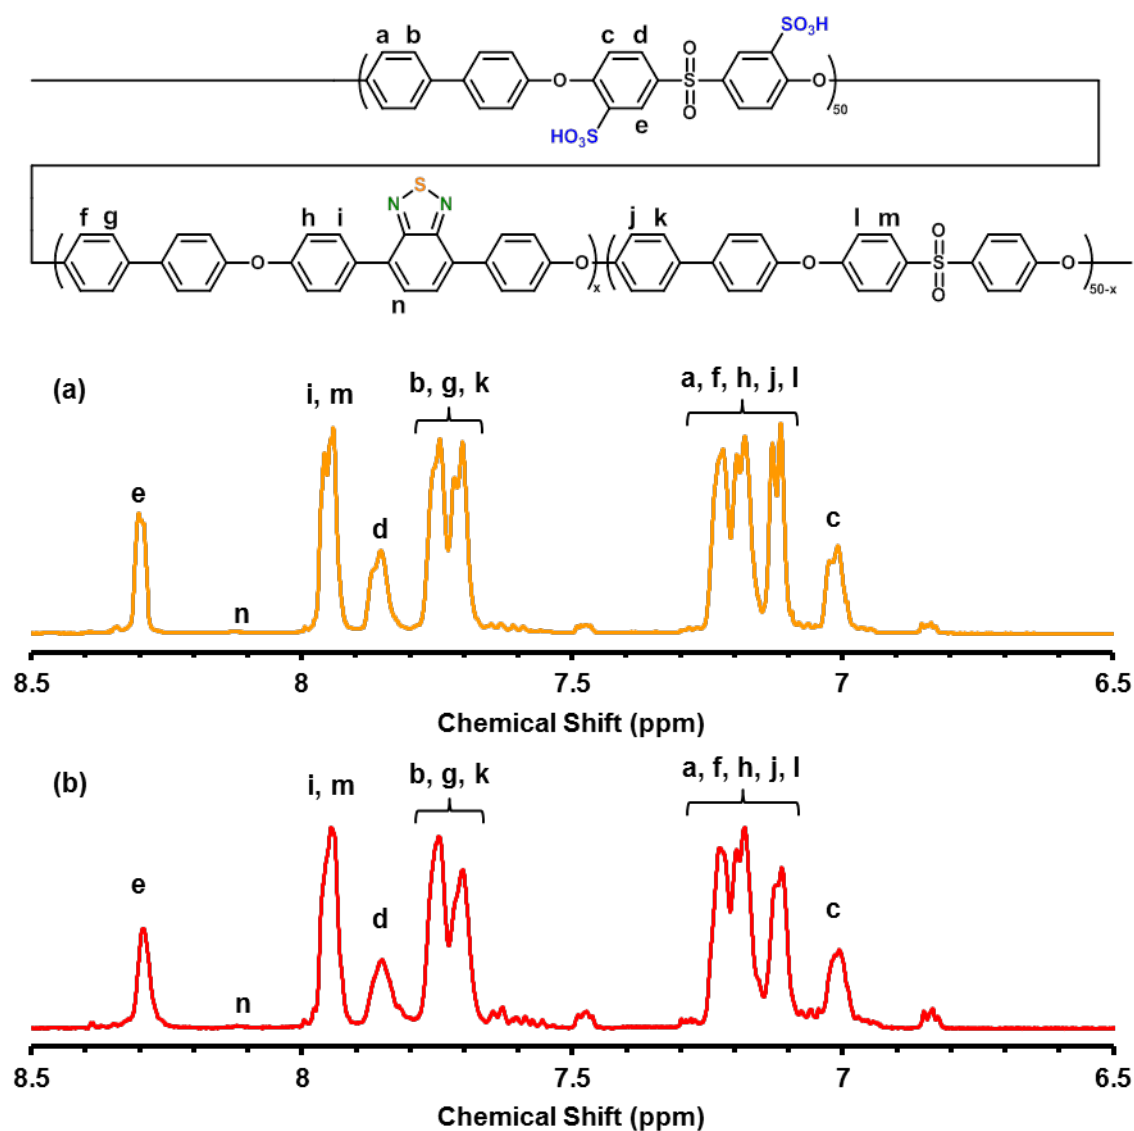

**Fig. S4** <sup>1</sup>H NMR spectra of an aromatic random polymer based on BT units. (a) SPES-0.1%BT (x = 0.1), (b) SPES-1%BT (x = 1).



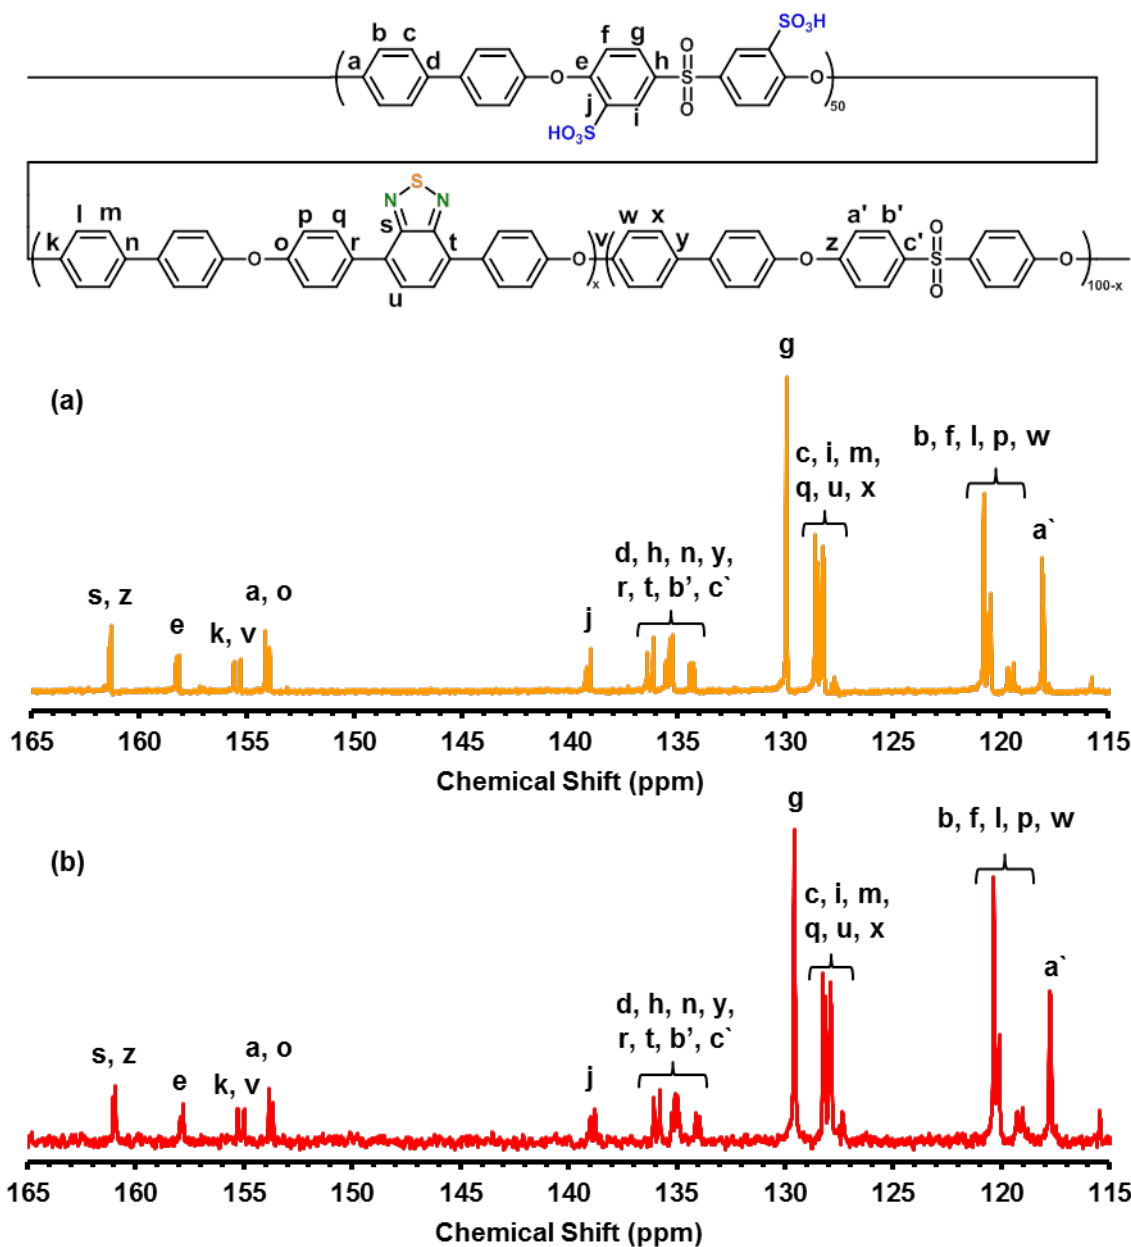

**Fig. S5**  $^{13}\text{C}$  NMR spectra of aromatic random polymer based on BT units. (a) SPES-0.1%BT ( $x = 0.1$ ) and (b) SPES-1%BT ( $x = 1$ ).

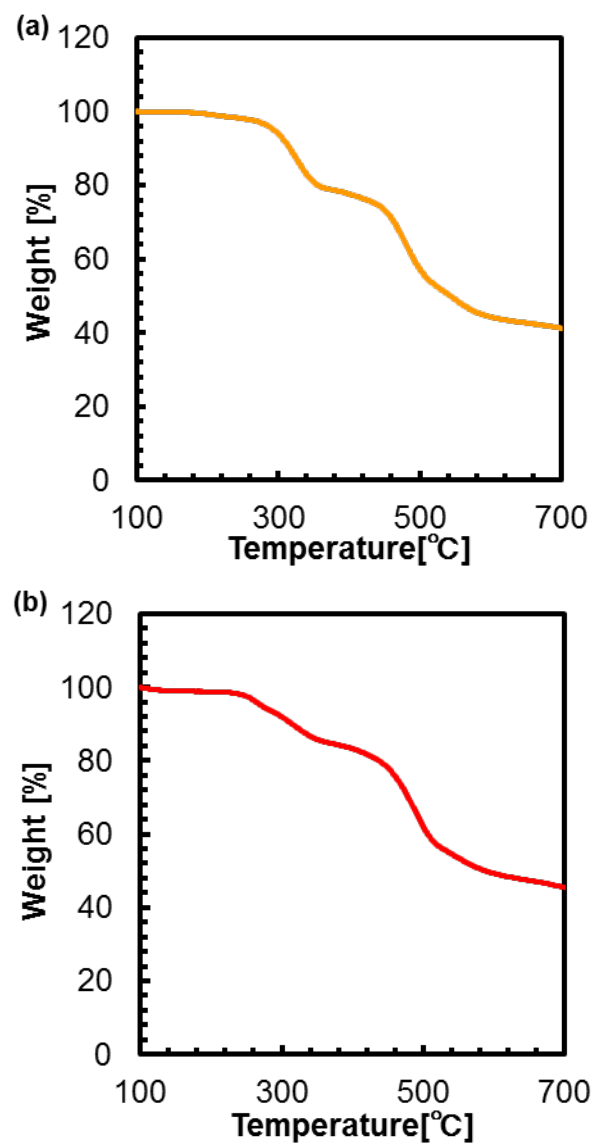

**Fig. S6** TG-curves of (a) SPES-0.1%BT ( $x = 0.1$ ) and (b) SPES-1%BT ( $x = 1$ ).

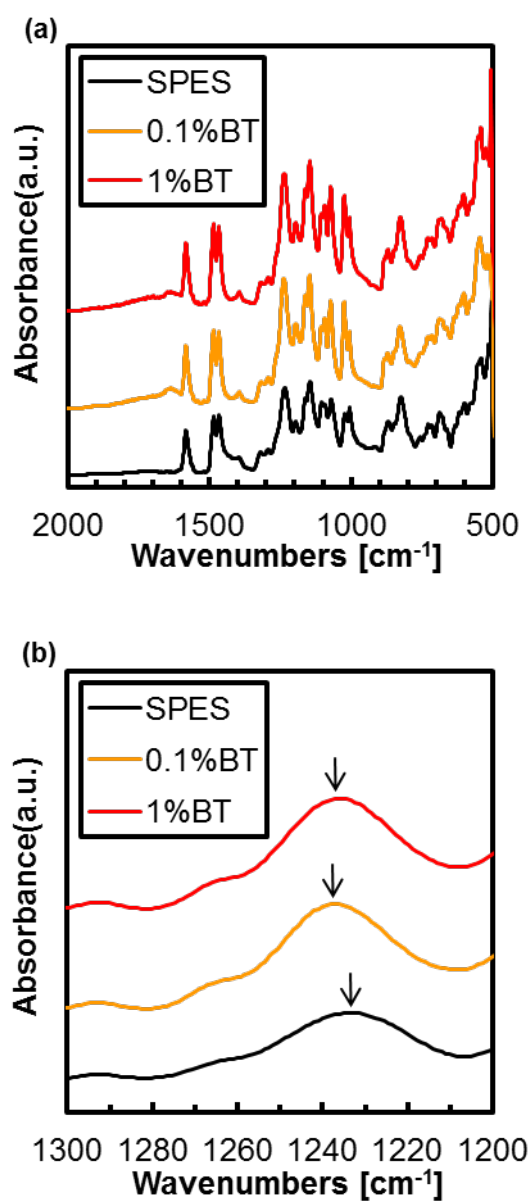

**Fig. S7** IR spectra in the (a) 2000–500  $\text{cm}^{-1}$  and (b) 1300–1200  $\text{cm}^{-1}$  range of SPES membrane; 0.1%BT membrane; 1%BT membrane.

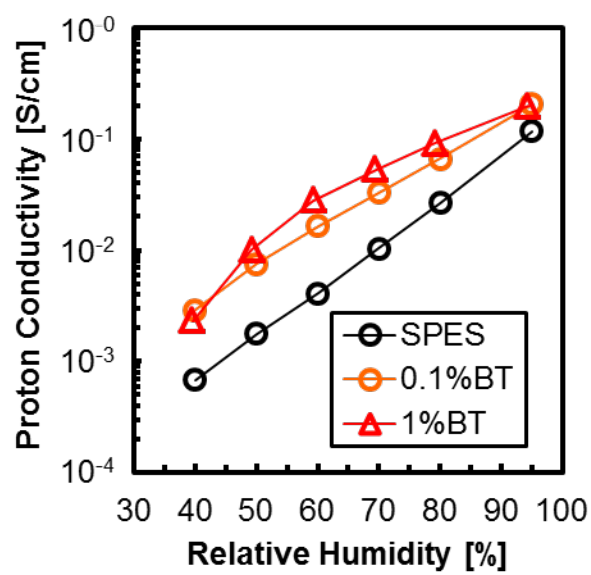

**Fig. S8** Proton conductivity as a function of relative humidity at 80°C.
